# Supplementary material
Source: publisher figshare collection journal article supplement (https://karger.figshare.com/articles/dataset/_/28493564)

Supplementary fig. 1 Evolution of standardized mortality ratio (SMR) by age and sex for causes of deaths


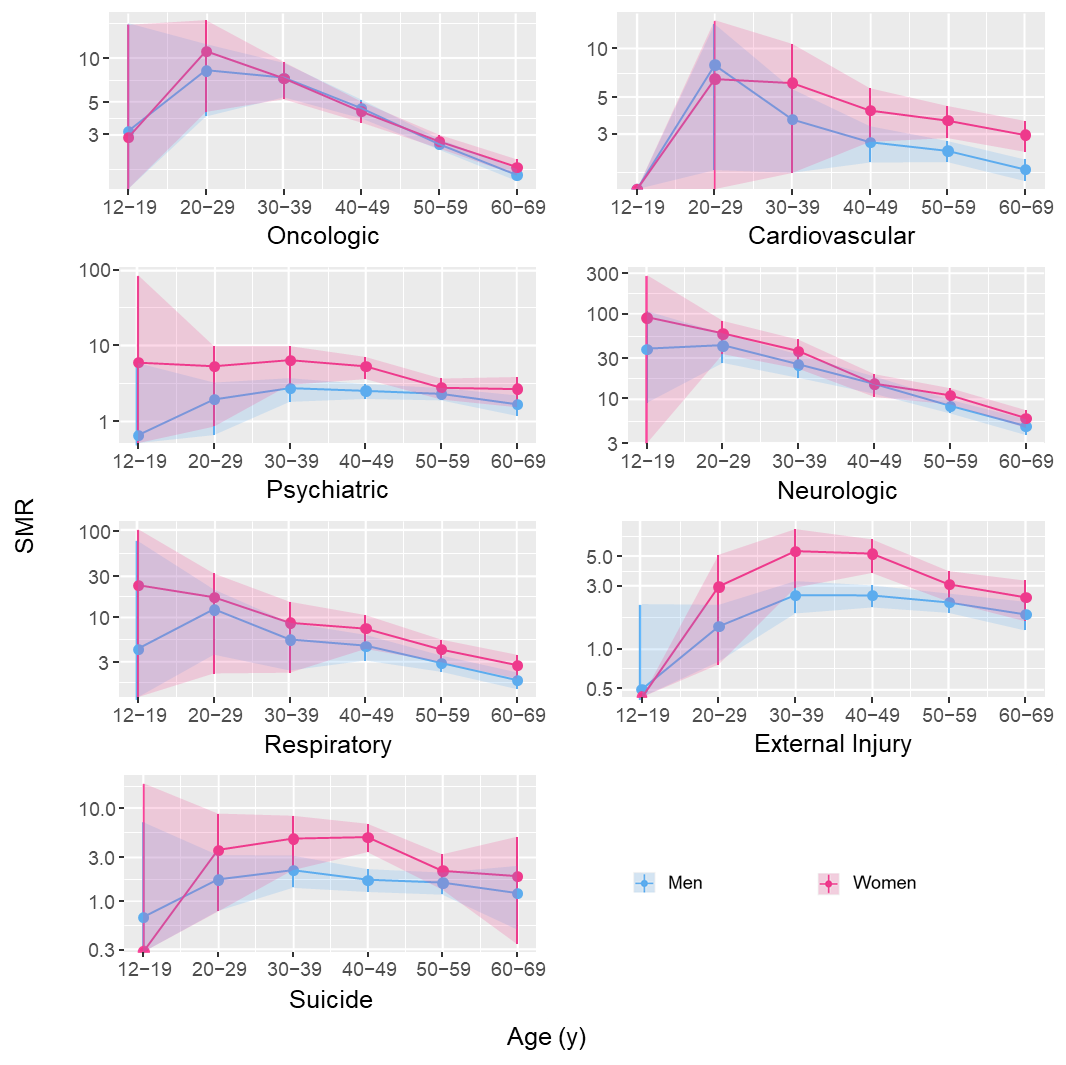

Supplement: Supplementary file 1 [file 1]
